# Supplementary material for: The role of deep learning in diagnostic imaging of spondyloarthropathies: a systematic review
Source: Springer Nature journal article supplement (doi:10.1007/s00330-024-11261-x), 2024-12-10

# **The Role of Deep Learning in Diagnostic Imaging of Spondyloarthropathies: A Systematic Review**

## **ELECTRONIC SUPPLEMENTARY MATERIAL**

Specific Boolean strings used to screen the different databases:

### **PubMed**

("Artificial Intelligence" OR "AI" OR "Deep Learning" OR "Machine Learning" OR "Neural Networks" OR "Computer Vision" OR "Automated Diagnosis" OR "Algorithm\*") AND

("Spondyloarthritis" OR "Ankylosing Spondylitis" OR "Axial Spondyloarthritis" OR "Spinal Arthritis" OR "Spondyloarthropathy" OR "Inflammatory Back Pain") AND

("Radiography" OR "Radiographic Diagnosis" OR "MRI" OR "Magnetic Resonance Imaging" OR "CT" OR "Computed Tomography" OR "X-Ray" OR "X-Ray Imaging" OR "Radiograph" OR "Imaging Techniques" OR "Diagnostic Imaging")

### **Embase**

('artificial intelligence'/exp OR 'AI' OR 'deep learning' OR 'machine learning' OR 'neural networks' OR 'computer vision' OR 'automated diagnosis' OR 'algorithm\*') AND

('spondyloarthritis'/exp OR 'ankylosing spondylitis'/exp OR 'axial spondyloarthritis' OR 'spinal arthritis' OR 'spondyloarthropathy' OR 'inflammatory back pain') AND

('radiography'/exp OR 'radiographic diagnosis' OR 'MRI' OR 'magnetic resonance imaging'/exp OR 'CT' OR 'computed tomography'/exp OR 'x-ray'/exp OR 'x-ray imaging' OR 'radiograph' OR 'imaging techniques' OR 'diagnostic imaging')

### **Web of Science**

(TS=("Artificial Intelligence" OR "AI" OR "Deep Learning" OR "Machine Learning" OR "Neural Networks" OR "Computer Vision" OR "Automated Diagnosis" OR "Algorithm\*")) AND

(TS=("Spondyloarthritis" OR "Ankylosing Spondylitis" OR "Axial Spondyloarthritis" OR "Spinal Arthritis" OR "Spondyloarthropathy" OR "Inflammatory Back Pain")) AND

(TS=("Radiography" OR "Radiographic Diagnosis" OR "MRI" OR "Magnetic Resonance Imaging" OR "CT" OR "Computed Tomography" OR "X-Ray" OR "X-Ray Imaging" OR "Radiograph" OR "Imaging Techniques" OR "Diagnostic Imaging"))

## Scopus

( TITLE-ABS-KEY ( "Artificial Intelligence" OR "AI" OR "Deep Learning" OR "Machine Learning" OR "Neural Networks" OR "Computer Vision" OR "Automated Diagnosis" OR "Algorithm\*" ) ) AND ( TITLE-ABS-KEY ( "Spondyloarthritis" OR "Ankylosing Spondylitis" OR "Axial Spondyloarthritis" OR "Spinal Arthritis" OR "Spondyloarthropathy" OR "Inflammatory Back Pain" ) ) AND ( TITLE-ABS-KEY ( "Radiography" OR "Radiographic Diagnosis" OR "MRI" OR "Magnetic Resonance Imaging" OR "CT" OR "Computed Tomography" OR "X-Ray" OR "X-Ray Imaging" OR "Radiograph" OR "Imaging Techniques" OR "Diagnostic Imaging" ) )

**Table S1: Impact Factor and Quartile Classifications of Journals Publishing Included Studies.**

| Author   | Year | Journal                                         | Impact Factor (IF) | Quartile |
|----------|------|-------------------------------------------------|--------------------|----------|
| Lee      | 2023 | Frontiers in Immunology                         | 7.6                | 1        |
| Folle    | 2022 | Rheumatology (Oxford)                           | 5.5                | 1        |
| Bressem  | 2022 | Radiology                                       | 29.1               | 1        |
| Koo      | 2022 | Therapeutic advances in musculoskeletal disease | 3.65               | 1        |
| Bordner  | 2023 | Diagnostic and Interventional Imaging           | 7.42               | 1        |
| Roles    | 2023 | Arthritis & rheumatology                        | 15.4               | 1        |
| Gou      | 2021 | Physics in medicine and biology                 | 4.1                | 4        |
| Lee      | 2021 | Diagnostics                                     | 3.99               | 3        |
| Zhang    | 2024 | European journal of radiology                   | 4.5                | 1        |
| Zhang    | 2023 | Journal of Digital Imaging                      | 4.9                | 1        |
| Lee      | 2023 | Diagnostics                                     | 3.99               | 3        |
| Berghe   | 2023 | European radiology                              | 7                  | 1        |
| Tenorio  | 2022 | Journal of Digital Imaging                      | 4.9                | 1        |
| Shenkman | 2019 | Medical image analysis                          | 10.9               | 1        |

|           |      |                                                                          |      |    |
|-----------|------|--------------------------------------------------------------------------|------|----|
| Bressemer | 2021 | Arthritis Research & Therapy                                             | 5.6  | 1  |
| Li        | 2023 | Frontiers in public health                                               | 3.9  | 2  |
| Tas       | 2023 | Biomedicines                                                             | 3    | 1  |
| Ureten    | 2023 | Modern rheumatology                                                      | 2.86 | 2  |
| Rzecki    | 2021 | Biocybernetics and Biomedical Engineering                                | 8.6  | 2  |
| Fernandez | 2022 | Lecture Notes on computer science (Book Chapter and Conference article). | NA   | NA |
| Lin       | 2024 | European Spine Journal                                                   | 2.8  | 1  |
| Faleiros  | 2020 | Advances in Rheumatology                                                 | 3    | 3  |

\*Impact factors were extracted from the websites of each corresponding journal. Quartiles were extracted from Scimago.

## Additional explanatory figures

**Figure S1: Comparative Overview of Deep Learning and Machine Learning.**

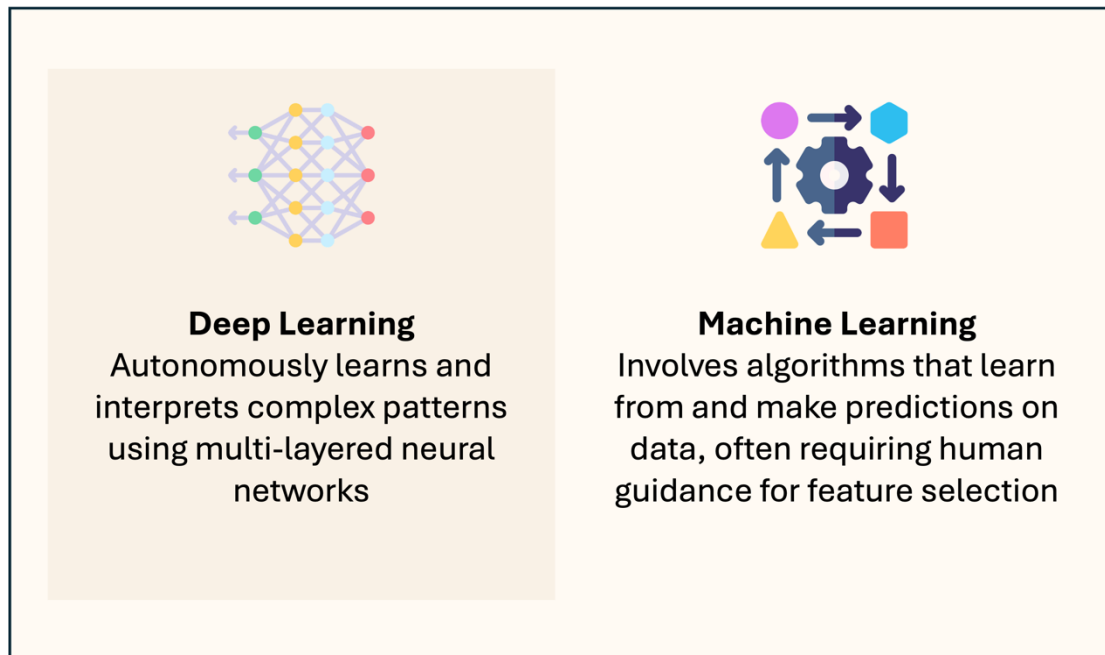

**Figure S2: Typical Convolutional Neural Networks (CNN) Workflow for the diagnosis of ankylosis.**

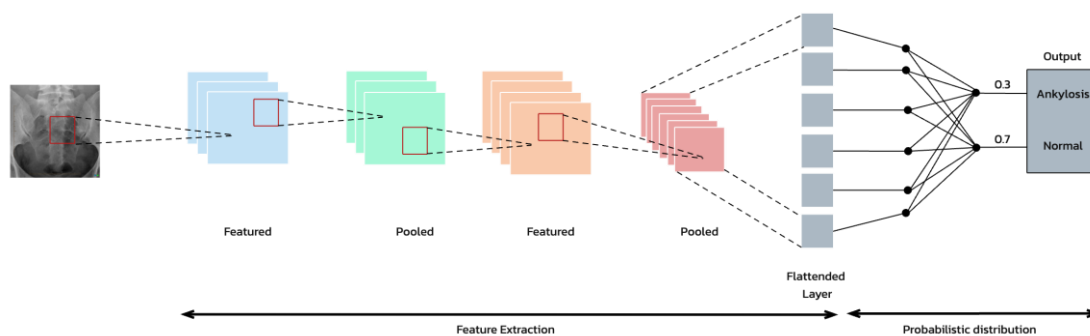

This schematic represents a convolutional neural network (CNN) architecture used for medical image analysis. An MRI input undergoes preprocessing to enhance features, which is then passed through consecutive convolutional layers where features are extracted and analyzed. Each layer applies filters to detect specific attributes, pooling layers to reduce dimensionality, and activation functions to introduce non-linearity, facilitating the identification of complex patterns. The final classification is done through fully connected layers, resulting in the output that categorizes the image into diagnostic categories, such as 'Ankylosis' or 'Normal'.

**Figure S3: Deep Learning Analysis of MRI for AS Diagnosis Utilizing 3D-Unet.**

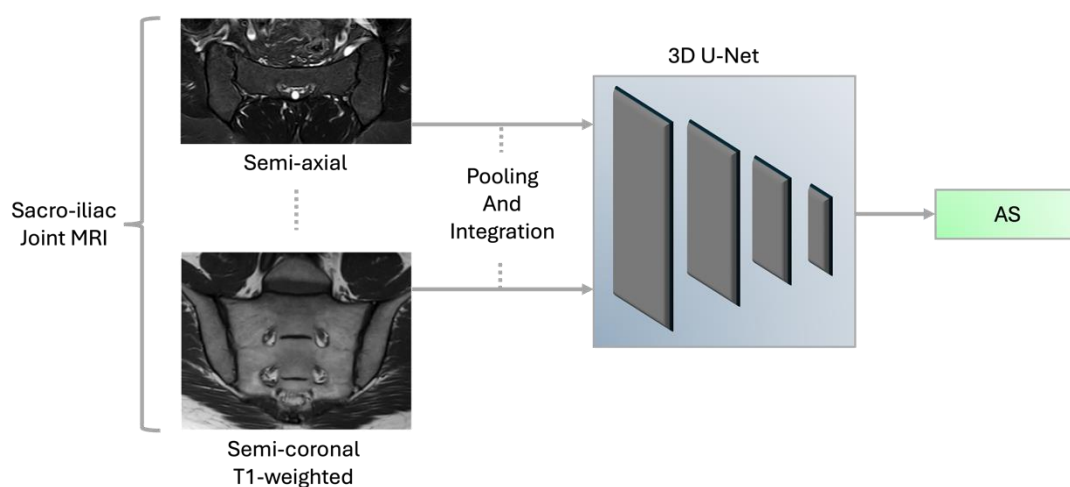

This figure presents a deep learning framework, specifically a U-Net model, processing MRI scans to diagnose Ankylosing Spondylitis (AS). Two MRI inputs, representing different anatomical planes, feed into the neural network which then utilizes convolutional layers to extract features and identify patterns indicative of AS, leading to a diagnostic output.

**Figure S4: Distribution of the Included Studies by Quartile and Year.**

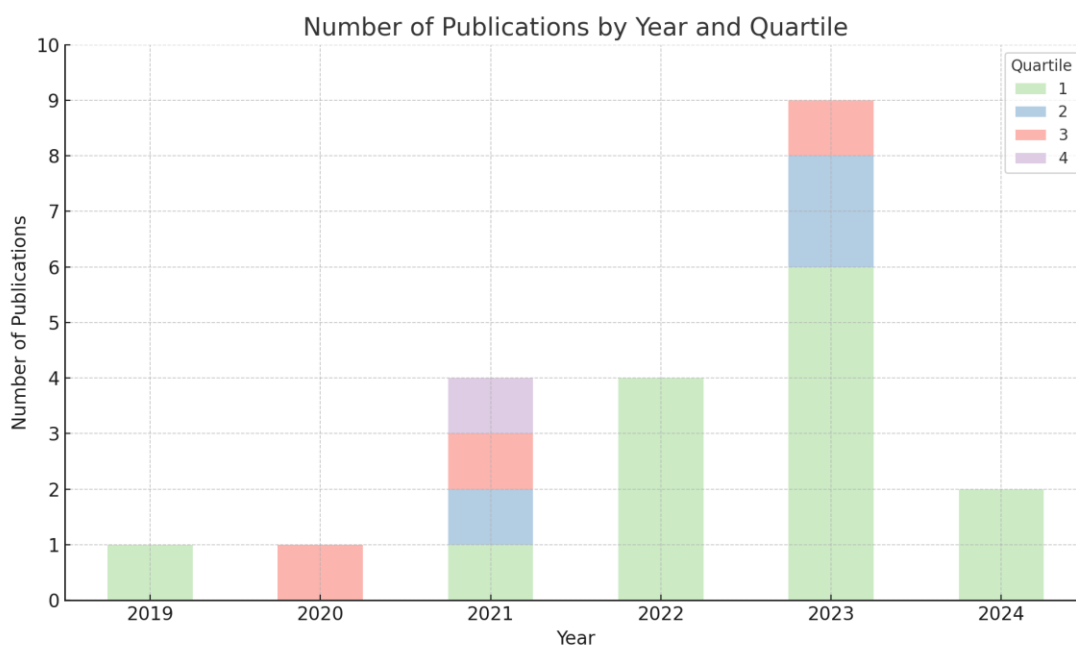

Supplement: MOESM1 [file 330_2024_11261_MOESM1_ESM.pdf]
